# Supplementary material for: The pathway to diagnosis of type 1 diabetes in children: a questionnaire study
Source: HighWire-hosted journal article supplement (doi:10.1136/bmjopen-2014-006470), 2015-03-01
Supplement: bmjopen-2014-006470supp_Questionnaire.pdf [file bmjopen-2014-006470supp_Questionnaire.pdf]

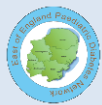

## Pathway to diagnosis of type 1 diabetes in children questionnaire

We are interested in your experience of the time before your child was diagnosed with diabetes. We know that recognising the symptoms of diabetes is difficult and we really want to know what you noticed and what made you first ask for medical advice from a doctor or nurse. The symptoms are different for every child so don't worry if your child didn't have all the symptoms mentioned. We are hoping to also find out how long children have symptoms for before they are diagnosed so please try to add dates wherever possible and be as accurate as you can. We have included a calendar on the next page with school holidays and bank holidays on it so please use this and your own diaries to help you remember.

### Section 1 - Information about your child and family

In this section we are interested in details about your child and family. This allows us to make sure that we have included children of different ages and from different places to make the results as useful as possible.

Gender of your child: Male ☐ Female ☐

Date of birth of your child: DD/MM/YY

Ethnic background? White ☐ Asian ☐ Black ☐ Chinese ☐ Mixed ☐ Other \_\_\_\_\_

Does your child have any other medical problems? Yes ☐ No ☐ (If yes, please give details)

\_\_\_\_\_  
\_\_\_\_\_

Does your child take any medication other than for diabetes? Yes ☐ No ☐ (If yes, please give details)

\_\_\_\_\_  
\_\_\_\_\_

Does anyone else in the family have diabetes?

|                            | Type 1                   | Type 2                   |
|----------------------------|--------------------------|--------------------------|
| Child's parent (s)         | <input type="checkbox"/> | <input type="checkbox"/> |
| Child's brother or sister? | <input type="checkbox"/> | <input type="checkbox"/> |
| Other (please specify)     | <input type="checkbox"/> | <input type="checkbox"/> |
| _____                      | <input type="checkbox"/> | <input type="checkbox"/> |
| _____                      | <input type="checkbox"/> | <input type="checkbox"/> |

Is anyone in the family medical / healthcare trained? e.g. a doctor, a nurse or a paramedic

Yes ☐ No ☐ (If yes, please give details)

\_\_\_\_\_  
\_\_\_\_\_

What are the child's parents' current occupations?

Child's mother \_\_\_\_\_

Child's father \_\_\_\_\_

Before your child was diagnosed did you know what the symptoms of diabetes in children are?

Yes ☐ No ☐ (If yes, please give details of those symptoms you knew of)

\_\_\_\_\_  
\_\_\_\_\_

What is your postcode?

\_\_\_\_ \_

How many other children live in the same house as your child?

0 ☐ 1 ☐ 2 ☐ 3 ☐ 4 + ☐

## Calendar

This calendar shows the school holidays and bank holidays. We have included it to help you remember when you noticed symptoms and other dates relating to your child's diagnosis. You may find it helpful to add important family dates such as birthdays and holidays.

### August 2012

| Mon | Tue | Wed | Thu | Fri | Sat | Sun |
|-----|-----|-----|-----|-----|-----|-----|
| 30  | 31  | 1   | 2   | 3   | 4   | 5   |
| 6   | 7   | 8   | 9   | 10  | 11  | 12  |
| 13  | 14  | 15  | 16  | 17  | 18  | 19  |
| 20  | 21  | 22  | 23  | 24  | 25  | 26  |
| 27  | 28  | 29  | 30  | 31  | 1   | 2   |
| 3   | 4   | 5   | 6   | 7   | 8   | 9   |

27<sup>th</sup> - Bank holiday

27<sup>th</sup> July – 12<sup>th</sup> August - Olympics

### September 2012

| Mon | Tue | Wed | Thu | Fri | Sat | Sun |
|-----|-----|-----|-----|-----|-----|-----|
| 27  | 28  | 29  | 30  | 31  | 1   | 2   |
| 3   | 4   | 5   | 6   | 7   | 8   | 9   |
| 10  | 11  | 12  | 13  | 14  | 15  | 16  |
| 17  | 18  | 19  | 20  | 21  | 22  | 23  |
| 24  | 25  | 26  | 27  | 28  | 29  | 30  |
| 1   | 2   | 3   | 4   | 5   | 6   | 7   |

3<sup>rd</sup> – school term starts

### October 2012

| Mon | Tue | Wed | Thu | Fri | Sat | Sun |
|-----|-----|-----|-----|-----|-----|-----|
| 1   | 2   | 3   | 4   | 5   | 6   | 7   |
| 8   | 9   | 10  | 11  | 12  | 13  | 14  |
| 15  | 16  | 17  | 18  | 19  | 20  | 21  |
| 22  | 23  | 24  | 25  | 26  | 27  | 28  |
| 29  | 30  | 31  | 1   | 2   | 3   | 4   |
| 5   | 6   | 7   | 8   | 9   | 10  | 11  |

29<sup>th</sup> Oct – 2<sup>nd</sup> Nov - half term

31<sup>st</sup> - Halloween

### November 2012

| Mon | Tue | Wed | Thu | Fri | Sat | Sun |
|-----|-----|-----|-----|-----|-----|-----|
| 29  | 30  | 31  | 1   | 2   | 3   | 4   |
| 5   | 6   | 7   | 8   | 9   | 10  | 11  |
| 12  | 13  | 14  | 15  | 16  | 17  | 18  |
| 19  | 20  | 21  | 22  | 23  | 24  | 25  |
| 26  | 27  | 28  | 29  | 30  | 1   | 2   |
| 3   | 4   | 5   | 6   | 7   | 8   | 9   |

29<sup>th</sup> Oct – 2<sup>nd</sup> Nov - half term

5<sup>th</sup> – Guy Fawkes day

### December 2012

| Mon | Tue | Wed | Thu | Fri | Sat | Sun |
|-----|-----|-----|-----|-----|-----|-----|
| 26  | 27  | 28  | 29  | 30  | 1   | 2   |
| 3   | 4   | 5   | 6   | 7   | 8   | 9   |
| 10  | 11  | 12  | 13  | 14  | 15  | 16  |
| 17  | 18  | 19  | 20  | 21  | 22  | 23  |
| 24  | 25  | 26  | 27  | 28  | 29  | 30  |
| 31  | 1   | 2   | 3   | 4   | 5   | 6   |

21<sup>st</sup> - school term ends

25<sup>th</sup> – Christmas Day

### January 2013

| Mon | Tue | Wed | Thu | Fri | Sat | Sun |
|-----|-----|-----|-----|-----|-----|-----|
| 31  | 1   | 2   | 3   | 4   | 5   | 6   |
| 7   | 8   | 9   | 10  | 11  | 12  | 13  |
| 14  | 15  | 16  | 17  | 18  | 19  | 20  |
| 21  | 22  | 23  | 24  | 25  | 26  | 27  |
| 28  | 29  | 30  | 31  | 1   | 2   | 3   |
| 4   | 5   | 6   | 7   | 8   | 9   | 10  |

8<sup>th</sup> – school term starts

### February 2013

| Mon | Tue | Wed | Thu | Fri | Sat | Sun |
|-----|-----|-----|-----|-----|-----|-----|
| 28  | 29  | 30  | 31  | 1   | 2   | 3   |
| 4   | 5   | 6   | 7   | 8   | 9   | 10  |
| 11  | 12  | 13  | 14  | 15  | 16  | 17  |
| 18  | 19  | 20  | 21  | 22  | 23  | 24  |
| 25  | 26  | 27  | 28  | 1   | 2   | 3   |
| 4   | 5   | 6   | 7   | 8   | 9   | 10  |

11<sup>th</sup> – 15<sup>th</sup> Half term

### March 2013

| Mon | Tue | Wed | Thu | Fri | Sat | Sun |
|-----|-----|-----|-----|-----|-----|-----|
| 25  | 26  | 27  | 28  | 1   | 2   | 3   |
| 4   | 5   | 6   | 7   | 8   | 9   | 10  |
| 11  | 12  | 13  | 14  | 15  | 16  | 17  |
| 18  | 19  | 20  | 21  | 22  | 23  | 24  |
| 25  | 26  | 27  | 28  | 29  | 30  | 31  |
| 1   | 2   | 3   | 4   | 5   | 6   | 7   |

28<sup>th</sup> - school term ends

31<sup>st</sup> - Easter Sunday

### April 2013

| Mon | Tue | Wed | Thu | Fri | Sat | Sun |
|-----|-----|-----|-----|-----|-----|-----|
| 1   | 2   | 3   | 4   | 5   | 6   | 7   |
| 8   | 9   | 10  | 11  | 12  | 13  | 14  |
| 15  | 16  | 17  | 18  | 19  | 20  | 21  |
| 22  | 23  | 24  | 25  | 26  | 27  | 28  |
| 29  | 30  | 1   | 2   | 3   | 4   | 5   |
| 6   | 7   | 8   | 9   | 10  | 11  | 12  |

1<sup>st</sup> – Easter Monday

15<sup>th</sup> – school term starts

### May 2013

| Mon | Tue | Wed | Thu | Fri | Sat | Sun |
|-----|-----|-----|-----|-----|-----|-----|
| 29  | 30  | 1   | 2   | 3   | 4   | 5   |
| 6   | 7   | 8   | 9   | 10  | 11  | 12  |
| 13  | 14  | 15  | 16  | 17  | 18  | 19  |
| 20  | 21  | 22  | 23  | 24  | 25  | 26  |
| 27  | 28  | 29  | 30  | 31  | 1   | 2   |
| 3   | 4   | 5   | 6   | 7   | 8   | 9   |

27<sup>th</sup> – 31<sup>st</sup> - half term

6<sup>th</sup> and 27<sup>th</sup> - Bank holidays

11<sup>th</sup> – FA cup final

### June 2013

| Mon | Tue | Wed | Thu | Fri | Sat | Sun |
|-----|-----|-----|-----|-----|-----|-----|
| 27  | 28  | 29  | 30  | 31  | 1   | 2   |
| 3   | 4   | 5   | 6   | 7   | 8   | 9   |
| 10  | 11  | 12  | 13  | 14  | 15  | 16  |
| 17  | 18  | 19  | 20  | 21  | 22  | 23  |
| 24  | 25  | 26  | 27  | 28  | 29  | 30  |
| 1   | 2   | 3   | 4   | 5   | 6   | 7   |

24<sup>th</sup> June – 7<sup>th</sup> July - Wimbledon

### July 2013

| Mon | Tue | Wed | Thu | Fri | Sat | Sun |
|-----|-----|-----|-----|-----|-----|-----|
| 1   | 2   | 3   | 4   | 5   | 6   | 7   |
| 8   | 9   | 10  | 11  | 12  | 13  | 14  |
| 15  | 16  | 17  | 18  | 19  | 20  | 21  |
| 22  | 23  | 24  | 25  | 26  | 27  | 28  |
| 29  | 30  | 31  | 1   | 2   | 3   | 4   |
| 5   | 6   | 7   | 8   | 9   | 10  | 11  |

24<sup>th</sup> June – 7<sup>th</sup> July - Wimbledon

23<sup>rd</sup> - school term ends

## Section 2 – Information about the symptoms you noticed before your child was diagnosed

In this section we are interested in all the symptoms your child had in the weeks or months leading up to when they were diagnosed with diabetes.

For each symptom please tick yes or no to indicate whether you noticed that symptom. If you did notice it, please add the date you first noticed it and what you thought the symptom was due to at the time.

| Symptom                                                 | Did you notice this symptom?                             | If yes, when did you notice this symptom? | What did you think the symptom was due to at the time? |
|---------------------------------------------------------|----------------------------------------------------------|-------------------------------------------|--------------------------------------------------------|
| Drinking more than usual                                | YES <input type="checkbox"/> NO <input type="checkbox"/> | DD/MM/YY                                  |                                                        |
| Weeing (passing urine) more than usual                  | YES <input type="checkbox"/> NO <input type="checkbox"/> | DD/MM/YY                                  |                                                        |
| Changes in appetite                                     | YES <input type="checkbox"/> NO <input type="checkbox"/> | DD/MM/YY                                  |                                                        |
| Going to the loo at night more than usual               | YES <input type="checkbox"/> NO <input type="checkbox"/> | DD/MM/YY                                  |                                                        |
| Being more tired than usual                             | YES <input type="checkbox"/> NO <input type="checkbox"/> | DD/MM/YY                                  |                                                        |
| Wetting the bed at night                                | YES <input type="checkbox"/> NO <input type="checkbox"/> | DD/MM/YY                                  |                                                        |
| Losing weight                                           | YES <input type="checkbox"/> NO <input type="checkbox"/> | DD/MM/YY                                  |                                                        |
| Vomiting                                                | YES <input type="checkbox"/> NO <input type="checkbox"/> | DD/MM/YY                                  |                                                        |
| Having accidents when passing urine                     | YES <input type="checkbox"/> NO <input type="checkbox"/> | DD/MM/YY                                  |                                                        |
| Tummy pain                                              | YES <input type="checkbox"/> NO <input type="checkbox"/> | DD/MM/YY                                  |                                                        |
| Fever                                                   | YES <input type="checkbox"/> NO <input type="checkbox"/> | DD/MM/YY                                  |                                                        |
| Constipation                                            | YES <input type="checkbox"/> NO <input type="checkbox"/> | DD/MM/YY                                  |                                                        |
| Different smelling breath                               | YES <input type="checkbox"/> NO <input type="checkbox"/> | DD/MM/YY                                  |                                                        |
| Skin infections                                         | YES <input type="checkbox"/> NO <input type="checkbox"/> | DD/MM/YY                                  |                                                        |
| Faster breathing                                        | YES <input type="checkbox"/> NO <input type="checkbox"/> | DD/MM/YY                                  |                                                        |
| Other changes in behaviour / mood (please give details) | YES <input type="checkbox"/> NO <input type="checkbox"/> | DD/MM/YY                                  |                                                        |
| <div></div> <div></div>                                 |                                                          |                                           |                                                        |
| Other (please specify)                                  | YES <input type="checkbox"/> NO <input type="checkbox"/> | DD/MM/YY                                  |                                                        |
| <div></div> <div></div>                                 |                                                          |                                           |                                                        |

Still thinking about the symptoms that you noticed at the time before your child was diagnosed with diabetes, when you first noticed each symptom, how much did each of them concern you?

| Symptom                                   | Not applicable,<br>my child did<br>not have this<br>symptom | Not at all               | A little                 | Quite a lot              | Very much                |
|-------------------------------------------|-------------------------------------------------------------|--------------------------|--------------------------|--------------------------|--------------------------|
| Drinking more than usual                  | <input type="checkbox"/>                                    | <input type="checkbox"/> | <input type="checkbox"/> | <input type="checkbox"/> | <input type="checkbox"/> |
| Weeing (passing urine) more than usual    | <input type="checkbox"/>                                    | <input type="checkbox"/> | <input type="checkbox"/> | <input type="checkbox"/> | <input type="checkbox"/> |
| Changes in appetite                       | <input type="checkbox"/>                                    | <input type="checkbox"/> | <input type="checkbox"/> | <input type="checkbox"/> | <input type="checkbox"/> |
| Going to the loo at night more than usual | <input type="checkbox"/>                                    | <input type="checkbox"/> | <input type="checkbox"/> | <input type="checkbox"/> | <input type="checkbox"/> |
| Being more tired than usual               | <input type="checkbox"/>                                    | <input type="checkbox"/> | <input type="checkbox"/> | <input type="checkbox"/> | <input type="checkbox"/> |
| Wetting the bed at night                  | <input type="checkbox"/>                                    | <input type="checkbox"/> | <input type="checkbox"/> | <input type="checkbox"/> | <input type="checkbox"/> |
| Losing weight                             | <input type="checkbox"/>                                    | <input type="checkbox"/> | <input type="checkbox"/> | <input type="checkbox"/> | <input type="checkbox"/> |
| Vomiting                                  | <input type="checkbox"/>                                    | <input type="checkbox"/> | <input type="checkbox"/> | <input type="checkbox"/> | <input type="checkbox"/> |
| Having accidents when passing urine       | <input type="checkbox"/>                                    | <input type="checkbox"/> | <input type="checkbox"/> | <input type="checkbox"/> | <input type="checkbox"/> |
| Tummy pain                                | <input type="checkbox"/>                                    | <input type="checkbox"/> | <input type="checkbox"/> | <input type="checkbox"/> | <input type="checkbox"/> |
| Fever                                     | <input type="checkbox"/>                                    | <input type="checkbox"/> | <input type="checkbox"/> | <input type="checkbox"/> | <input type="checkbox"/> |
| Constipation                              | <input type="checkbox"/>                                    | <input type="checkbox"/> | <input type="checkbox"/> | <input type="checkbox"/> | <input type="checkbox"/> |
| Different smelling breath                 | <input type="checkbox"/>                                    | <input type="checkbox"/> | <input type="checkbox"/> | <input type="checkbox"/> | <input type="checkbox"/> |
| Skin infections                           | <input type="checkbox"/>                                    | <input type="checkbox"/> | <input type="checkbox"/> | <input type="checkbox"/> | <input type="checkbox"/> |
| Faster breathing                          | <input type="checkbox"/>                                    | <input type="checkbox"/> | <input type="checkbox"/> | <input type="checkbox"/> | <input type="checkbox"/> |
| Other changes in behaviour/mood           | <input type="checkbox"/>                                    | <input type="checkbox"/> | <input type="checkbox"/> | <input type="checkbox"/> | <input type="checkbox"/> |
| Other (please specify)<br>_____<br>_____  | <input type="checkbox"/>                                    | <input type="checkbox"/> | <input type="checkbox"/> | <input type="checkbox"/> | <input type="checkbox"/> |

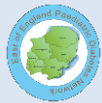

## Section 3 – Information about what made you decide to seek medical advice

In this section we are interested in what made you decide to seek medical advice and where you went for that advice.

Did you look for information about the symptoms your child had in any of the places below?

|              |                          |             |                          |
|--------------|--------------------------|-------------|--------------------------|
| Books        | <input type="checkbox"/> | Magazines   | <input type="checkbox"/> |
| The internet | <input type="checkbox"/> | Other _____ | <input type="checkbox"/> |

If you have ticked any of the boxes above, please give details below of where you looked and what information you read \_\_\_\_\_

Did you discuss the symptoms your child had with any of the following groups of people? (Please tick all that apply)

|                |                          |                               |                          |
|----------------|--------------------------|-------------------------------|--------------------------|
| Family members | <input type="checkbox"/> | School / nursery / play group | <input type="checkbox"/> |
| Friends        | <input type="checkbox"/> | Other _____                   | <input type="checkbox"/> |

If you have ticked any of the boxes above, please give details below of who you spoke to and what advice they gave \_\_\_\_\_

When did you first think about seeking medical advice about the symptoms? DD/MM/YY

When did you decide to seek medical advice about the symptoms? DD/MM/YY

What was it that made you decide to seek medical advice then?

Where did you go **first** for that medical advice?

|            |                          |                      |                          |                      |                          |
|------------|--------------------------|----------------------|--------------------------|----------------------|--------------------------|
| GP         | <input type="checkbox"/> | Out of hours GP      | <input type="checkbox"/> | Emergency department | <input type="checkbox"/> |
| NHS Direct | <input type="checkbox"/> | Health visitor       | <input type="checkbox"/> | Other _____          | <input type="checkbox"/> |
| Pharmacy   | <input type="checkbox"/> | Minor illness centre | <input type="checkbox"/> |                      |                          |

Where did you **first** see a doctor or nurse?

|                      |                          |                 |                          |                      |                          |
|----------------------|--------------------------|-----------------|--------------------------|----------------------|--------------------------|
| GP                   | <input type="checkbox"/> | Out of hours GP | <input type="checkbox"/> | Emergency department | <input type="checkbox"/> |
| Minor illness centre | <input type="checkbox"/> | Other _____     | <input type="checkbox"/> |                      |                          |

When was that first appointment with a doctor or nurse? DD/MM/YY

What was the main concern that you mentioned at that first appointment?

Had you considered diabetes at that stage? Yes ☐ No ☐ If yes, please explain what had made you think it might be diabetes

Thinking about your decision to seek medical advice, how much do you think each of the following made you seek medical advice **sooner**?

|                                                                    | Not at all               | A little                 | Quite a lot              | Very much                |
|--------------------------------------------------------------------|--------------------------|--------------------------|--------------------------|--------------------------|
| Concern there was something serious wrong                          | <input type="checkbox"/> | <input type="checkbox"/> | <input type="checkbox"/> | <input type="checkbox"/> |
| The symptoms were getting worse                                    | <input type="checkbox"/> | <input type="checkbox"/> | <input type="checkbox"/> | <input type="checkbox"/> |
| The symptoms were not getting any better                           | <input type="checkbox"/> | <input type="checkbox"/> | <input type="checkbox"/> | <input type="checkbox"/> |
| Wanting reassurance from a doctor                                  | <input type="checkbox"/> | <input type="checkbox"/> | <input type="checkbox"/> | <input type="checkbox"/> |
| Comments from other family members                                 | <input type="checkbox"/> | <input type="checkbox"/> | <input type="checkbox"/> | <input type="checkbox"/> |
| Comments from school                                               | <input type="checkbox"/> | <input type="checkbox"/> | <input type="checkbox"/> | <input type="checkbox"/> |
| Comments from friends                                              | <input type="checkbox"/> | <input type="checkbox"/> | <input type="checkbox"/> | <input type="checkbox"/> |
| Written information from books, magazines, posters or the internet | <input type="checkbox"/> | <input type="checkbox"/> | <input type="checkbox"/> | <input type="checkbox"/> |

And how much do you think each of the following made you wait and seek medical advice **later**?

|                                                                      | Not at all               | A little                 | Quite a lot              | Very much                |
|----------------------------------------------------------------------|--------------------------|--------------------------|--------------------------|--------------------------|
| Difficulty getting an appointment with a doctor or nurse             | <input type="checkbox"/> | <input type="checkbox"/> | <input type="checkbox"/> | <input type="checkbox"/> |
| Waiting to get an appointment with a particular doctor or nurse      | <input type="checkbox"/> | <input type="checkbox"/> | <input type="checkbox"/> | <input type="checkbox"/> |
| Concern about having to wait at the surgery to see a doctor or nurse | <input type="checkbox"/> | <input type="checkbox"/> | <input type="checkbox"/> | <input type="checkbox"/> |
| Worry about wasting the time of the doctor or nurse                  | <input type="checkbox"/> | <input type="checkbox"/> | <input type="checkbox"/> | <input type="checkbox"/> |
| Fear of getting a serious diagnosis                                  | <input type="checkbox"/> | <input type="checkbox"/> | <input type="checkbox"/> | <input type="checkbox"/> |
| Worry that the doctor would not take you seriously                   | <input type="checkbox"/> | <input type="checkbox"/> | <input type="checkbox"/> | <input type="checkbox"/> |
| The symptoms weren't very serious                                    | <input type="checkbox"/> | <input type="checkbox"/> | <input type="checkbox"/> | <input type="checkbox"/> |
| Hope that the symptoms would go away                                 | <input type="checkbox"/> | <input type="checkbox"/> | <input type="checkbox"/> | <input type="checkbox"/> |



## Section 4 – Information about the diagnosis

In this section we are interested who made the diagnosis, how the diagnosis was made and how your child was at the time.

Was the diagnosis of diabetes made or suggested at that first appointment? Yes ☐ No ☐

If not, how many more times did you see a health professional before you were told your child might have diabetes?

1 ☐ 2 ☐ 3 ☐ 4 ☐ 5+ ☐

When were you told your child had diabetes? DD/MM/YY

Who told you your child might have diabetes?

GP ☐ Out of hours GP ☐ Emergency department ☐  
Hospital doctor ☐ Health visitor ☐ Other \_\_\_\_\_

Which of the following tests did your child have before the diagnosis?

Urine dipstick ☐ Finger prick blood test ☐ Fasting blood test ☐

Did your child need to have fluids through a tube (a drip)? Yes ☐ No ☐

How long did your child stay in hospital after the diagnosis was made? \_\_\_\_\_ nights

Did your child have diabetic ketoacidosis? Yes ☐ No ☐ I don't know ☐

## Section 5 – Other information

In your opinion, do you feel there was anything that prolonged you finding out that your child has diabetes? (Please continue over the page if you need more space)

---

---

---

---

---

Do you have any other comments about the symptoms your child had or how the diagnosis was made? (Please continue over the page if you need more space)

---

---

---

---

Thank you very much for completing this questionnaire.

Please now put it in the pre-paid envelope and return it to:

Dr Juliet Usher-Smith, University of Cambridge, Dept. Public Health & Primary Care, Strangeways  
Research Laboratory, 2 Worts Causeway, Cambridge CB1 8RN.
