# Supplementary material for: The pathway to diagnosis of type 1 diabetes in children: a questionnaire study
Source: HighWire-hosted journal article supplement (doi:10.1136/bmjopen-2014-006470), 2015-03-01
Supplement: bmjopen-2014-006470supp_table1.pdf [file bmjopen-2014-006470supp_table1.pdf]

Appendix Table 1. Definitions of DKA used across the 11 hospital sites

| Hospital | Glucose > 11mmol/L | Ketones > 3mmol/L | pH < 7.3 | pH < 7.3 AND bicarb < 15mmol/L | pH < 7.3 OR bicarb < 15mmol/L | Ketones in urine or blood | Glucose and ketones in urine | Symptoms | Treated according to DKA protocol |
|----------|--------------------|-------------------|----------|--------------------------------|-------------------------------|---------------------------|------------------------------|----------|-----------------------------------|
| 1        | •                  |                   | •        |                                |                               | •                         |                              |          |                                   |
| 2        | •                  | •                 |          |                                | •                             |                           | •                            |          |                                   |
| 3        | •                  | •                 |          |                                | •                             |                           |                              |          |                                   |
| 4        | •                  |                   |          | •                              |                               |                           |                              | •        |                                   |
| 5        |                    |                   |          |                                | •                             |                           |                              |          |                                   |
| 6        | •                  |                   |          |                                | •                             |                           |                              |          |                                   |
| 7        | •                  | •                 |          |                                | •                             |                           |                              |          |                                   |
| 8        | •                  |                   |          | •                              |                               |                           |                              |          | •                                 |
| 9        | •                  |                   |          | •                              |                               |                           |                              |          |                                   |
| 10       | •                  | •                 |          |                                | •                             |                           |                              |          |                                   |
| 11       | •                  |                   |          |                                | •                             |                           |                              |          |                                   |
